# Supplementary material for: DNA Nicks Promote Efficient and Safe Targeted Gene Correction
Source: PubMed Central journal article supplement (PMC3164693; doi:10.1371/journal.pone.0023981), 2011-09-01
Supplement: pone.0023981.s004.pdf [file pone.0023981.s004.pdf]

**Table S2. Raw data used in Figures 1C, 2B, 2C and 3.**

| Transfection        | quintile 1           |                          |                   | quintile 2           |                          |                   | quintile 3           |                          |                   | quintile 4           |                          |                   | quintile 5           |                          |                   | total population |                     |                   |
|---------------------|----------------------|--------------------------|-------------------|----------------------|--------------------------|-------------------|----------------------|--------------------------|-------------------|----------------------|--------------------------|-------------------|----------------------|--------------------------|-------------------|------------------|---------------------|-------------------|
|                     | % GFP+ in Quintile 1 | % mCherry+ in Quintile 1 | GFP:mCherry ratio | % GFP+ in Quintile 2 | % mCherry+ in Quintile 2 | GFP:mCherry ratio | % GFP+ in Quintile 3 | % mCherry+ in Quintile 3 | GFP:mCherry ratio | % GFP+ in Quintile 4 | % mCherry+ in Quintile 4 | GFP:mCherry ratio | % GFP+ in Quintile 5 | % mCherry+ in Quintile 5 | GFP:mCherry ratio | % GFP+ in total  | % mCherry+ in total | GFP:mCherry ratio |
| inactive + donor-1A | 0                    | 0                        |                   | 0                    | 6.90E-03                 |                   | 0                    | 0                        |                   | 0                    | 0                        |                   | 0                    | 7.28E-03                 |                   | 0                | 1.52E-03            |                   |
| inactive + donor-1B | 0                    | 0                        |                   | 0                    | 0                        |                   | 0                    | 0                        |                   | 0                    | 0                        |                   | 7.73E-03             | 0                        |                   | 8.20E-04         | 0                   |                   |
| inactive + donor-1C | 0                    | 0                        |                   | 0                    | 0                        |                   | 0                    | 0                        |                   | 5.48E-03             | 0                        |                   | 3.25E-03             | 0                        |                   | 1.47E-03         | 0                   |                   |
| inactive + donor-2A | 0                    | 0                        |                   | 0                    | 2.42E-03                 |                   | 0                    | 0                        |                   | 0                    | 0                        |                   | 7.88E-03             | 7.88E-03                 |                   | 6.88E-04         | 1.38E-03            |                   |
| inactive + donor-2B | 0                    | 0                        |                   | 0                    | 2.79E-03                 |                   | 0                    | 0.0169                   |                   | 0                    | 0                        |                   | 0.0159               | 0                        |                   | 1.35E-03         | 1.35E-03            |                   |
| inactive + donor-3A | 0                    | 0                        |                   | 0                    | 0                        |                   | 0                    | 0                        |                   | 0                    | 0                        |                   | 8.35E-03             | 0                        |                   | 7.43E-04         | 0                   |                   |
| inactive + donor-3B | 0                    | 0                        |                   | 0                    | 0                        |                   | 0                    | 0                        |                   | 3.15E-03             | 0                        |                   | 4.42E-03             | 0                        |                   | 7.65E-04         | 0                   |                   |
| inactive + donor-3C | 0                    | 0                        |                   | 0                    | 0                        |                   | 0                    | 0                        |                   | 0                    | 0                        |                   | 0                    | 0                        |                   | 0                | 0                   |                   |
| Mean                | 0.000                | 0.000                    |                   | 0.000                | 0.002                    |                   | 0.000                | 0.002                    |                   | 0.001                | 0.000                    |                   | 0.006                | 0.002                    |                   | 0.001            | 0.001               |                   |
| SEM                 | 0.000                | 0.000                    |                   | 0.000                | 0.001                    |                   | 0.000                | 0.002                    |                   | 0.001                | 0.000                    |                   | 0.002                | 0.001                    |                   | 0.000            | 0.000               |                   |
| nickase + donor-1A  | 0                    | 0                        | #DIV/0!           | 0                    | 0                        | #DIV/0!           | 0                    | 0.0128                   | 0.000             | 0.122                | 0.0136                   | 8.971             | 0.347                | 0                        | #DIV/0!           | 0.0707           | 4.21E-03            | 16.793            |
| nickase + donor-1B  | 0                    | 0                        | #DIV/0!           | 0                    | 0                        | #DIV/0!           | 0.0525               | 0.0131                   | 4.008             | 0.114                | 0.0131                   | 8.702             | 0.524                | 0.0204                   | 25.686            | 0.0896           | 5.81E-03            | 15.422            |
| nickase + donor-1C  | 0                    | 5.48E-03                 | 0.000             | 0                    | 2.56E-03                 | 0.000             | 6.27E-03             | 0.0188                   | 0.334             | 0.114                | 0.0193                   | 5.907             | 0.404                | 0.016                    | 25.250            | 0.073            | 9.42E-03            | 7.749             |
| nickase + donor-2A  | 0                    | 0                        | #DIV/0!           | 0                    | 0                        | #DIV/0!           | 7.31E-03             | 0                        | #DIV/0!           | 0.0748               | 9.35E-03                 | 8.000             | 0.315                | 0.0109                   | 28.899            | 0.0412           | 2.10E-03            | 19.619            |
| nickase + donor-2B  | 0                    | 2.13E-03                 | 0.000             | 0                    | 9.99E-04                 | 0.000             | 0                    | 0                        | #DIV/0!           | 0.114                | 0.0252                   | 4.524             | 0.3                  | 7.42E-03                 | 40.431            | 0.0428           | 4.52E-03            | 9.469             |
| nickase + donor-3A  | 0                    | 0                        | #DIV/0!           | 1.55E-03             | 0                        | #DIV/0!           | 9.43E-03             | 0.0283                   | 0.333             | 0.0611               | 3.22E-03                 | 18.975            | 0.243                | 4.26E-03                 | 57.042            | 0.0305           | 2.20E-03            | 13.864            |
| nickase + donor-3B  | 0                    | 0                        | #DIV/0!           | 0                    | 0                        | #DIV/0!           | 0.0156               | 7.79E-03                 | 2.003             | 0.0532               | 0.0125                   | 4.256             | 0.217                | 0.0123                   | 17.642            | 0.0272           | 3.35E-03            | 8.119             |
| nickase + donor-3C  | 0                    | 4.18E-03                 | 0.000             | 0                    | 2.31E-03                 | 0.000             | 7.80E-03             | 0                        | #DIV/0!           | 0.066                | 0.0126                   | 5.238             | 0.227                | 0.029                    | 7.828             | 0.0293           | 6.31E-03            | 4.643             |
| Mean                | 0.000                | 0.001                    | #DIV/0!           | 0.000                | 0.001                    | #DIV/0!           | 0.012                | 0.010                    | 1.335             | 0.090                | 0.014                    | 8.072             | 0.322                | 0.013                    | 28.968            | 0.051            | 0.005               | 11.960            |
| SEM                 | 0.000                | 0.001                    | #DIV/0!           | 0.000                | 0.000                    | #DIV/0!           | 0.006                | 0.004                    | 0.754             | 0.010                | 0.002                    | 1.690             | 0.037                | 0.003                    | 6.015             | 0.008            | 0.001               | 1.841             |
| cleavase + donor-1A | 9.99E-03             | 0.145                    | 0.069             | 0.128                | 1.31                     | 0.098             | 0.771                | 6.21                     | 0.124             | 1.27                 | 7.53                     | 0.169             | 1.45                 | 4.2                      | 0.345             | 0.198            | 1.15                | 0.172             |
| cleavase + donor-1B | 8.72E-03             | 0.166                    | 0.053             | 0.147                | 1.61                     | 0.091             | 1.04                 | 6.42                     | 0.162             | 1.13                 | 7.26                     | 0.156             | 1.33                 | 3.81                     | 0.349             | 0.19             | 1.17                | 0.162             |
| cleavase + donor-1C | 9.19E-03             | 0.095                    | 0.097             | 0.104                | 1.17                     | 0.089             | 0.762                | 5.23                     | 0.146             | 1.45                 | 6.27                     | 0.231             | 1.27                 | 3.44                     | 0.369             | 0.175            | 0.877               | 0.200             |
| cleavase + donor-2A | 4.42E-03             | 0.0379                   | 0.117             | 0.0578               | 0.32                     | 0.181             | 1.05                 | 4.52                     | 0.232             | 1.84                 | 6.71                     | 0.274             | 1.4                  | 3.5                      | 0.400             | 0.153            | 0.587               | 0.261             |
| cleavase + donor-2B | 2.84E-03             | 0.0418                   | 0.068             | 0.0484               | 0.322                    | 0.150             | 0.84                 | 4.39                     | 0.191             | 1.62                 | 6.21                     | 0.261             | 1.17                 | 3.45                     | 0.339             | 0.145            | 0.627               | 0.231             |
| cleavase + donor-3A | 2.60E-03             | 0.0301                   | 0.086             | 0.0841               | 0.41                     | 0.205             | 1.08                 | 3.4                      | 0.318             | 1.49                 | 4.48                     | 0.333             | 1.35                 | 2.28                     | 0.592             | 0.139            | 0.411               | 0.338             |
| cleavase + donor-3B | 6.32E-04             | 0.0316                   | 0.020             | 0.0713               | 0.419                    | 0.170             | 0.824                | 3.74                     | 0.220             | 1.46                 | 4.97                     | 0.294             | 0.998                | 2.21                     | 0.452             | 0.121            | 0.476               | 0.254             |
| cleavase + donor-3C | 1.83E-03             | 0.0286                   | 0.064             | 0.0472               | 0.318                    | 0.148             | 0.829                | 3.15                     | 0.263             | 1.31                 | 4.37                     | 0.300             | 0.976                | 2.04                     | 0.478             | 0.112            | 0.39                | 0.287             |
| Mean                | 0.005                | 0.072                    | 0.072             | 0.086                | 0.735                    | 0.142             | 0.900                | 4.633                    | 0.207             | 1.446                | 5.975                    | 0.252             | 1.243                | 3.116                    | 0.416             | 0.154            | 0.711               | 0.238             |
| SEM                 | 0.001                | 0.020                    | 0.010             | 0.013                | 0.189                    | 0.016             | 0.047                | 0.436                    | 0.023             | 0.078                | 0.435                    | 0.022             | 0.063                | 0.290                    | 0.031             | 0.011            | 0.112               | 0.021             |
